# Supplementary material for: RETRACTED ARTICLE: Indoleamine 2,3-Dioxygenase 1 (IDO1) Promotes Cardiac Hypertrophy via a PI3K-AKT-mTOR-Dependent Mechanism
Source: PubMed Central journal article supplement (PMC8211584; doi:10.1007/s12012-021-09657-y), 2021-05-21
Supplement: 12012_2021_9657_MOESM1_ESM.pdf [file 12012_2021_9657_MOESM1_ESM.pdf]

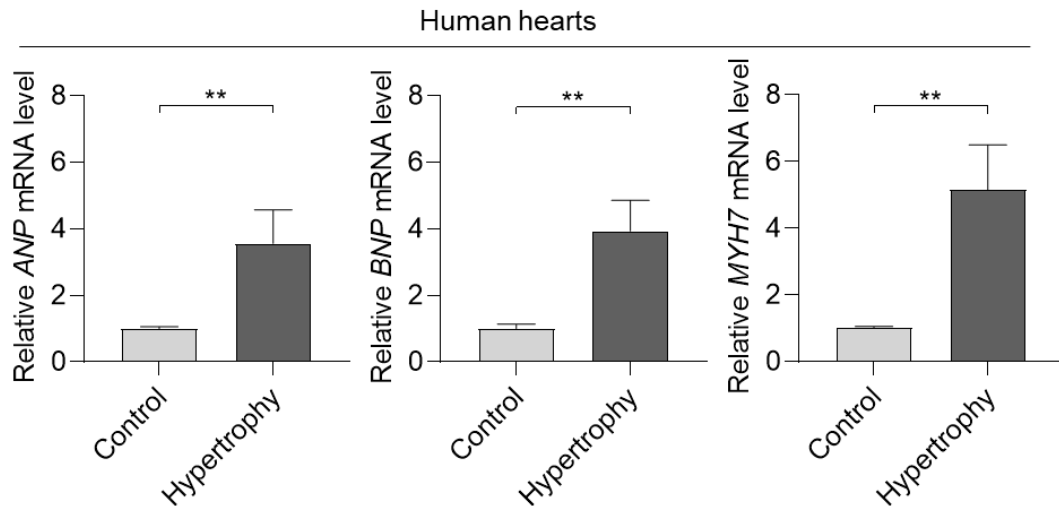

**Supplementary Figure 1 Expression of hypertrophic fetal genes in control and hypertrophy heart tissues of humans.** RT-qPCR analysis of the expression of hypertrophic genes (*ANP*, *BNP*, and *MYH7*) in the control and hypertrophic hearts of humans.  $n=5$  in each group.  $**p<0.01$  by Student's *t* test. *ANP*, atrial natriuretic peptide; *BNP*, brain natriuretic peptide; *MYH7*,  $\beta$ -myosin heavy chain.

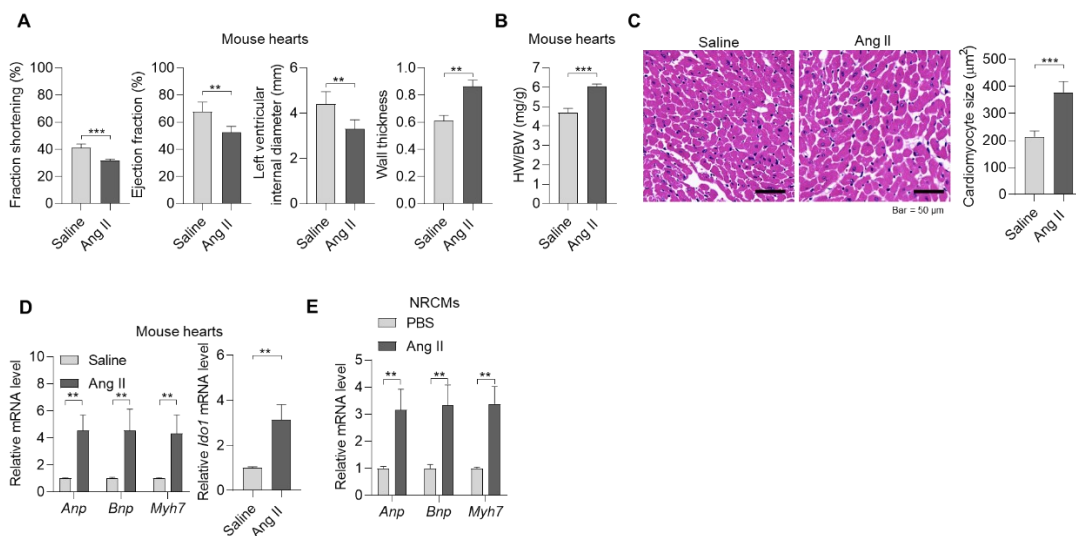

**Supplementary Figure 2 Validation of hypertrophic growth of mouse hearts and rat cardiomyocytes.** (A) Fraction shortening, ejection fraction, left wall thickness, and left ventricular internal diameters of mice with/without cardiac hypertrophy. Cardiac hypertrophy was induced by subcutaneously chronic infusion of Ang II (1.3 mg/kg/day) for 28 days. Ang II, angiotensin II.  $n=5$  in each group.  $**p<0.01$ ,  $***p<0.001$  by Student's *t* test. (B) Heart weight-to-body weight ratio of mice with/without cardiac hypertrophy. Cardiac hypertrophy was induced by subcutaneously chronic infusion of Ang II (1.3 mg/kg/day) for 28 days.  $n=5$  in each group.  $***p<0.001$  by Student's *t* test. (C) Haematoxylin and eosin (H&E) staining show the increased

cardiomyocyte size in mice with cardiac hypertrophy. Cardiac hypertrophy was induced by subcutaneously chronic infusion of Ang II (1.3 mg/kg/day) for 28 days. Then the heart tissues were harvested and subjected to H&E staining. n=5 in each group. \*\*\* $p < 0.001$  by Student's *t* test. (D) qRT-PCR shows the expression of hypertrophic genes (*Anp*, *Bnp*, *Myh7*) in control and hypertrophic neonatal rat cardiomyocytes (NRCMs). Cardiomyocytes were treated with Ang II (1  $\mu$ M) for 48 hours to induce cardiomyocyte hypertrophy. n=3 in each group. \*\* $p < 0.01$  by Student's *t* test.

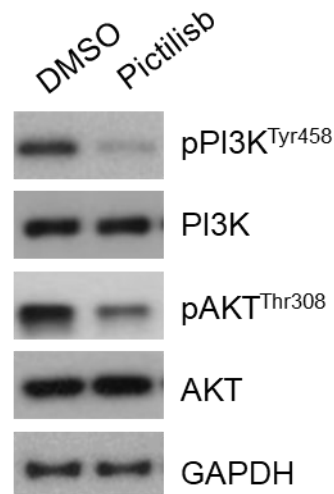

**Supplementary Figure 3. Inhibitors effects on PI3K pathway.**

Cardiomyocyte cells were with/without PI3K inhibitor pictilisib (100 nM; Panel C) for additional 48 hours. Then, western blot was performed to test the effects.
